# Supplementary material for: Vectors for Inhaled Gene Therapy in Lung Cancer. Application for Nano Oncology and Safety of Bio Nanotechnology
Source: MDPI journal article supplement (doi:10.3390/ijms130910828), 2012-08-29
Supplement: s1 [file s1]

*Correction*

## **Zarogoulidis, P., et al., Vectors for Inhaled Gene Therapy in Lung Cancer. Application for Nano Oncology and Safety of Bio Nanotechnology. *Int. J. Mol. Sci.* 2012, 13, 10828–10862**

**Paul Zarogoulidis<sup>1,2,\*</sup>, Nikos K. Karamanos<sup>3</sup>, Konstantinos Porpodis<sup>1</sup>, Kalliopi Domvri<sup>1</sup>, Haidong Huang<sup>4</sup>, Wolfgang Hohenforst-Schmidt<sup>5</sup>, Eugene P. Goldberg<sup>6</sup> and Konstantinos Zarogoulidis<sup>1</sup>**

- <sup>1</sup> Pulmonary Department-Oncology Unit, “G. Papanikolaou” General Hospital, Aristotle University of Thessaloniki, Thessaloniki 57010, Greece; E-Mails: kporpodis@yahoo.gr (K.P.); kellybio4@hotmail.com (K.D.); zarog@med.auth.gr (K.Z.)
- <sup>2</sup> Pulmonary Department-Interventional Unit, “Ruhrland Klinik”, University of Essen, Essen 45239, Germany
- <sup>3</sup> Laboratory of Biochemistry, University of Patras, Patras 25200, Greece; E-Mail: n.k.karamanos@upatras.gr
- <sup>4</sup> Department of Respiratory diseases, Changhai hospital, Second Military Medical University, Shanghai 200433, China; E-Mail: hhdongbs@126.com
- <sup>5</sup> II Medical Clinic, Hospital of Coburg, University of Wurzburg, Coburg 96450, Germany; E-Mail: w.h-s@gmx.de
- <sup>6</sup> Biomaterials Science & Engineering, Department of Materials Science & Engineering, University of Florida, FL 32611, USA; E-Mail: egold@mse.ufl.edu
- \* Author to whom correspondence should be addressed; E-Mail: pzarog@hotmail.com; Tel.: +30-697-727-1974; Fax: +30-231-099-2433.

*Received: 28 October 2012; in revised form: 30 October 2012 / Accepted: 30 October 2012 / Published: 18 December 2012*

---

The authors wish to add this correction on their paper published in *IJMS* [1]. The first author's name is misspelled and the correct name is Paul Zarogoulidis. In addition, the 6th author's name is incorrect and should be corrected to Wolfgang Hohenforst-Schmidt. These errors have been amended in an amended version of the manuscript, which is available from the International Journal of Molecular Sciences website. The authors and publisher apologize for the inconvenience.

The corrected version can be accessed at: <http://www.mdpi.com/1422-0067/13/12/17290/s1>.

## Reference

1. Zarogoulidis, P.; Karamanos, N.K.; Porpodis, K.; Domvri, K.; Huang, H.; Hohenforst-Schmidt, W.; Goldberg, E.P.; Zarogoulidis, K. Vectors for Inhaled Gene Therapy in Lung Cancer. Application for Nano Oncology and Safety of Bio Nanotechnology. *Int. J. Mol. Sci.* **2012**, *13*, 10828–10862.

© 2012 by the authors; licensee MDPI, Basel, Switzerland. This article is an open access article distributed under the terms and conditions of the Creative Commons Attribution license (<http://creativecommons.org/licenses/by/3.0/>).
